# Supplementary material for: Tie2 protects the vasculature against thrombus formation in systemic inflammation
Source: JCI journal article supplement (doi:10.1172/jci97488), 2018-01-23
Supplement: sd1 [file 1]

# Supplemental Data for

## **Tie2 protects the vasculature against thrombus formation in systemic inflammation**

Sarah J. Higgins<sup>#</sup>, Karen De Ceunynck<sup>#</sup>, John Kellum, Xiuying Chen, Xuesong Gu, Sharjeel A. Chaudhry, Sol Schulman, Towia A. Libermann, Shulin Lu, Nathan I. Shapiro, David C. Christiani, Robert Flaumenhaft\* & Samir M. Parikh\*

<sup>#</sup> These authors contributed equally to the work.

\* These authors contributed equally to the work and to whom correspondence should be addressed. [sparikh1@bidmc.harvard.edu](mailto:sparikh1@bidmc.harvard.edu) or [rflaumen@bidmc.harvard.edu](mailto:rflaumen@bidmc.harvard.edu)

| Characteristic         | Sepsis<br>( <i>n</i> =7) | Sepsis DIC<br>( <i>n</i> =7) | <i>P</i> value  |
|------------------------|--------------------------|------------------------------|-----------------|
| Age (year)             | 62 (39.2 – 65.7)         | 60 (41.0 – 72.0)             | 0.6958          |
| Female                 | 2 (25%)                  | 3 (37.5%)                    | <i>ns</i> (1.0) |
| Race, <i>n</i> (%)     |                          |                              |                 |
| Asian/Pacific Islander | 0                        | 2 (28.6%)                    |                 |
| Caucasian              | 7 (100%)                 | 4 (57.1%)                    | <i>ns</i> (0.2) |
| Hispanic               | 0                        | 1 (14.2%)                    |                 |
| min platelet count     | 186.0 (152.0 - 286.0)    | 21.0 (14.0 – 49.0)           | 0.0006          |

**Supplemental Table 1. Demographics and clinical characteristics of the sepsis and sepsis DIC study population.**

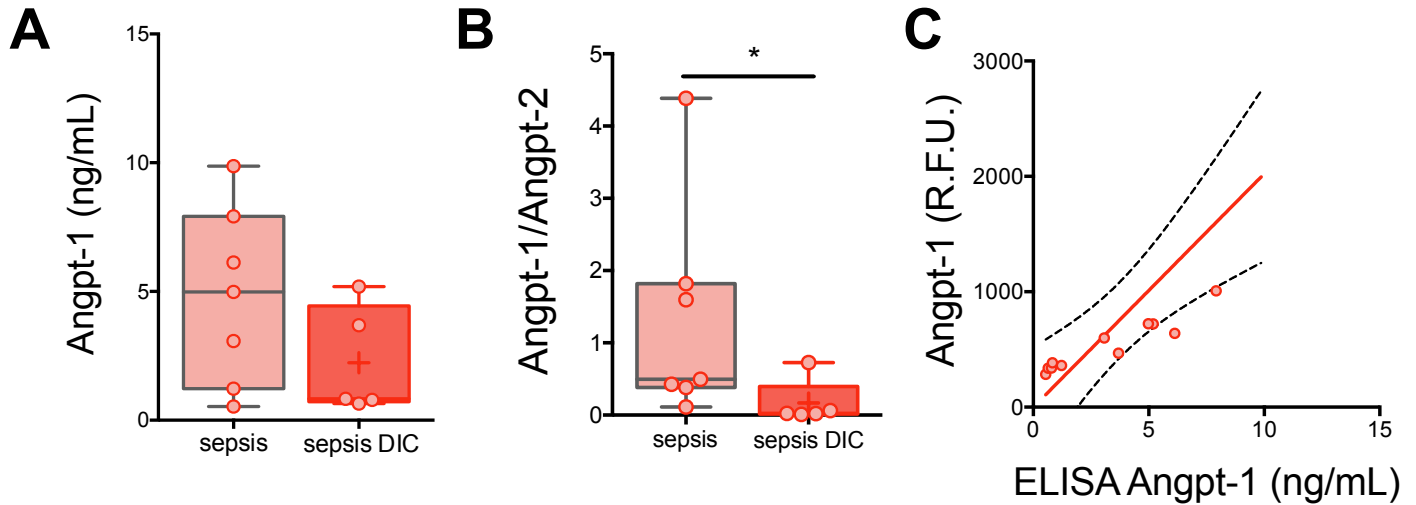

**Supplemental Figure 1. Plasma angiopoietin levels in sepsis DIC discovery cohort.**

(A) Plasma Angpt-1 levels determined by ELISA,  $n = 5$  for Angpt-1 sepsis DIC plasma and ratio measurements due to insufficient volume for  $n = 2$  samples for ELISA analysis. (B) Within-patient relative Angpt-1 to Angpt-2 levels measured by ELISA. \* $P < 0.05$ , \*\* $P < 0.005$ , Mann-Whitney  $U$  test. (C) Scatter plot showing correlation between the two methods of analysis (SOMAScan and ELISA) for plasma Angpt-1 levels ( $r^2 = 0.6303$ ,  $P = 0.0020$ ,  $n = 12$ ).

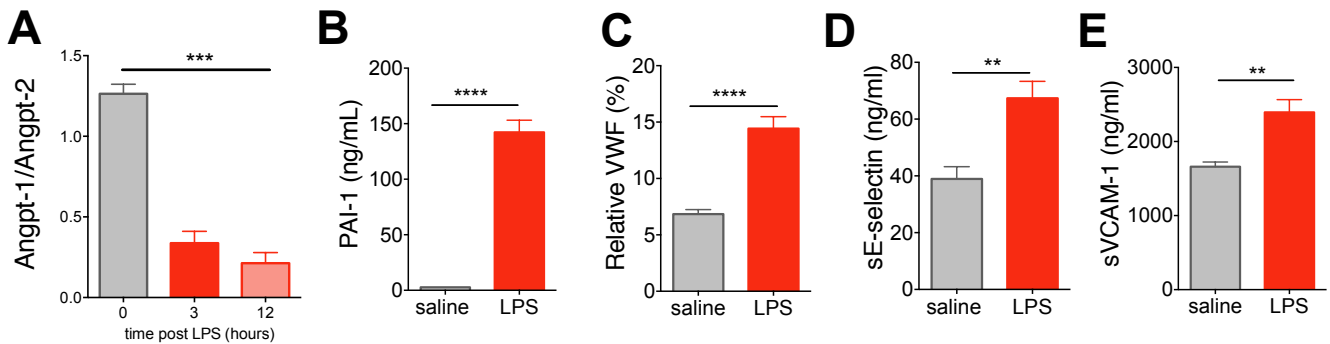

**Supplemental Figure 2. Plasma angiopoietin levels and markers of endothelial activation in a murine LPS-induced DIC model.**

(A) Relative plasma Angpt-1 to Angpt-2 ratio kinetics in C57Bl/6J mice challenged with LPS (10 mg/kg) or saline measured at specific time points (0, 3 and 12 hours). \*\*\* $P = 0.0002$ , Kruskal-Wallis ANOVA test. Markers of endothelial activation, including (K) Plasminogen activator inhibitor-1; PAI-1, (L) Von Willebrand factor; VWF, (M) soluble E-selectin and (N) soluble VCAM-1 measured by ELISA in plasma of C57Bl/6J mice challenged with LPS for 3 hours or saline. Data represent mean  $\pm$  SEM ( $n \geq 5$  per group). \*\*  $P < 0.01$ , \*\*\*  $P < 0.001$ , Mann Whitney  $U$ .

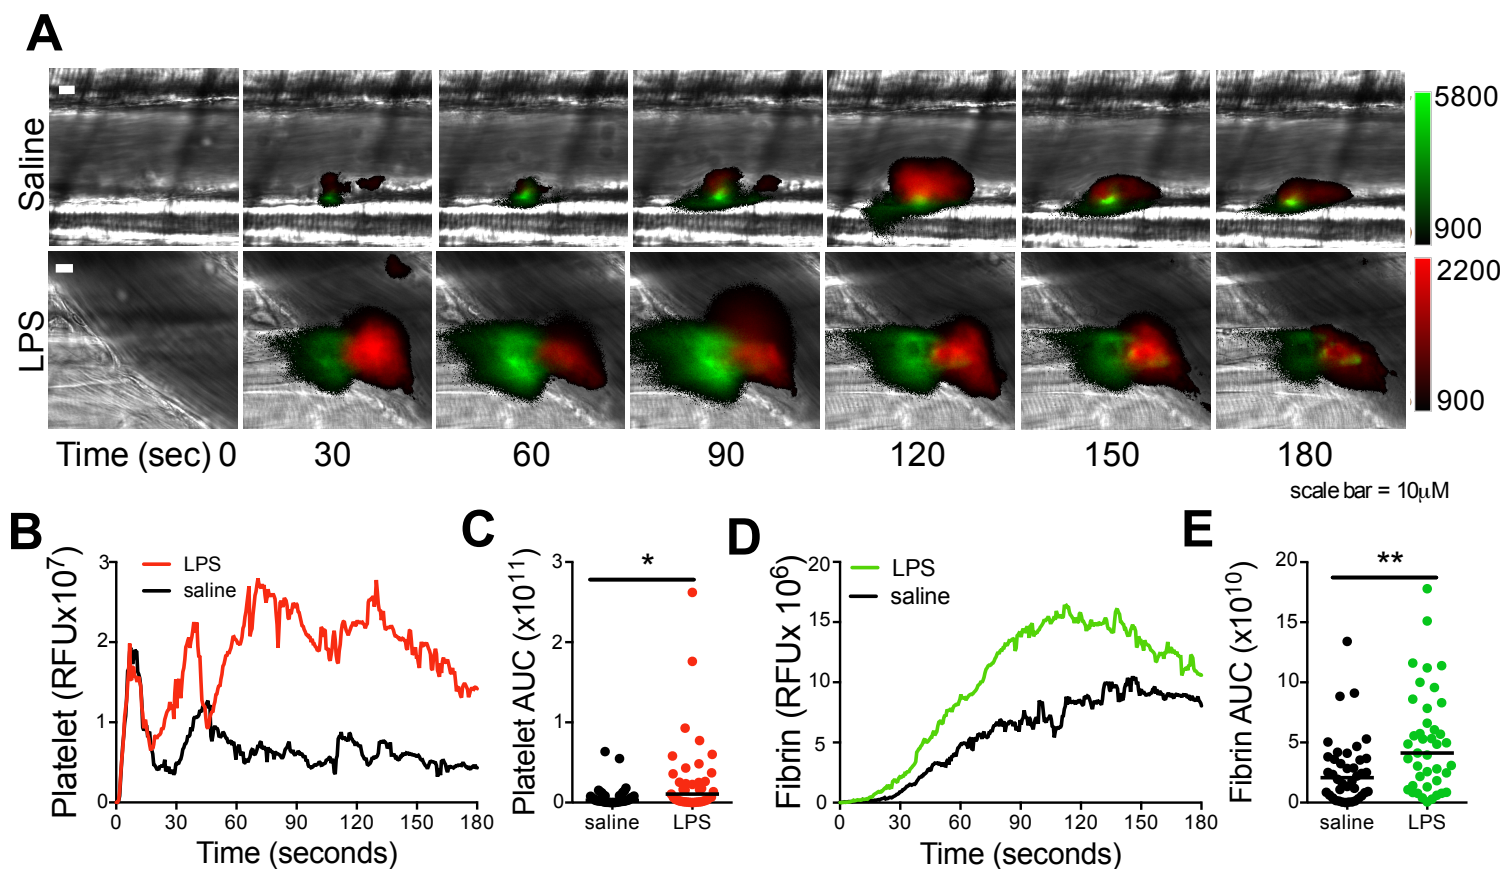

**Supplemental Figure 3. Prothrombotic response in venules following LPS.**

Platelet and fibrin accumulation at sites of laser injury was monitored in cremaster venules of C57Bl/6J mice 1-3 hours following saline or 10 mg/kg LPS injection. Platelets and fibrin were visualized by infusion of anti-platelet (CD42b; 0.1 mg/g body weight) and anti-fibrin (59D8; 0.5 mg/g body weight) antibodies, conjugated to Dylight 649 and 488 respectively. **(A)** Representative binarized images of a thrombus (*red = platelets*; *green = fibrin*) for saline and LPS-treated mice. Median integrated fluorescent intensities and area under the curve (AUC) for individual thrombi were calculated for platelets **(B,C)** and fibrin **(D,E)** in saline (*black*) and LPS-treated mice (*red or green*). **(c,e)** Data are represented as median AUC of individual thrombi (saline  $n = 40$ ; LPS  $n = 41$ ), \* $P < 0.05$ ; \*\* $P < 0.01$ , Mann Whitney  $U$  test.

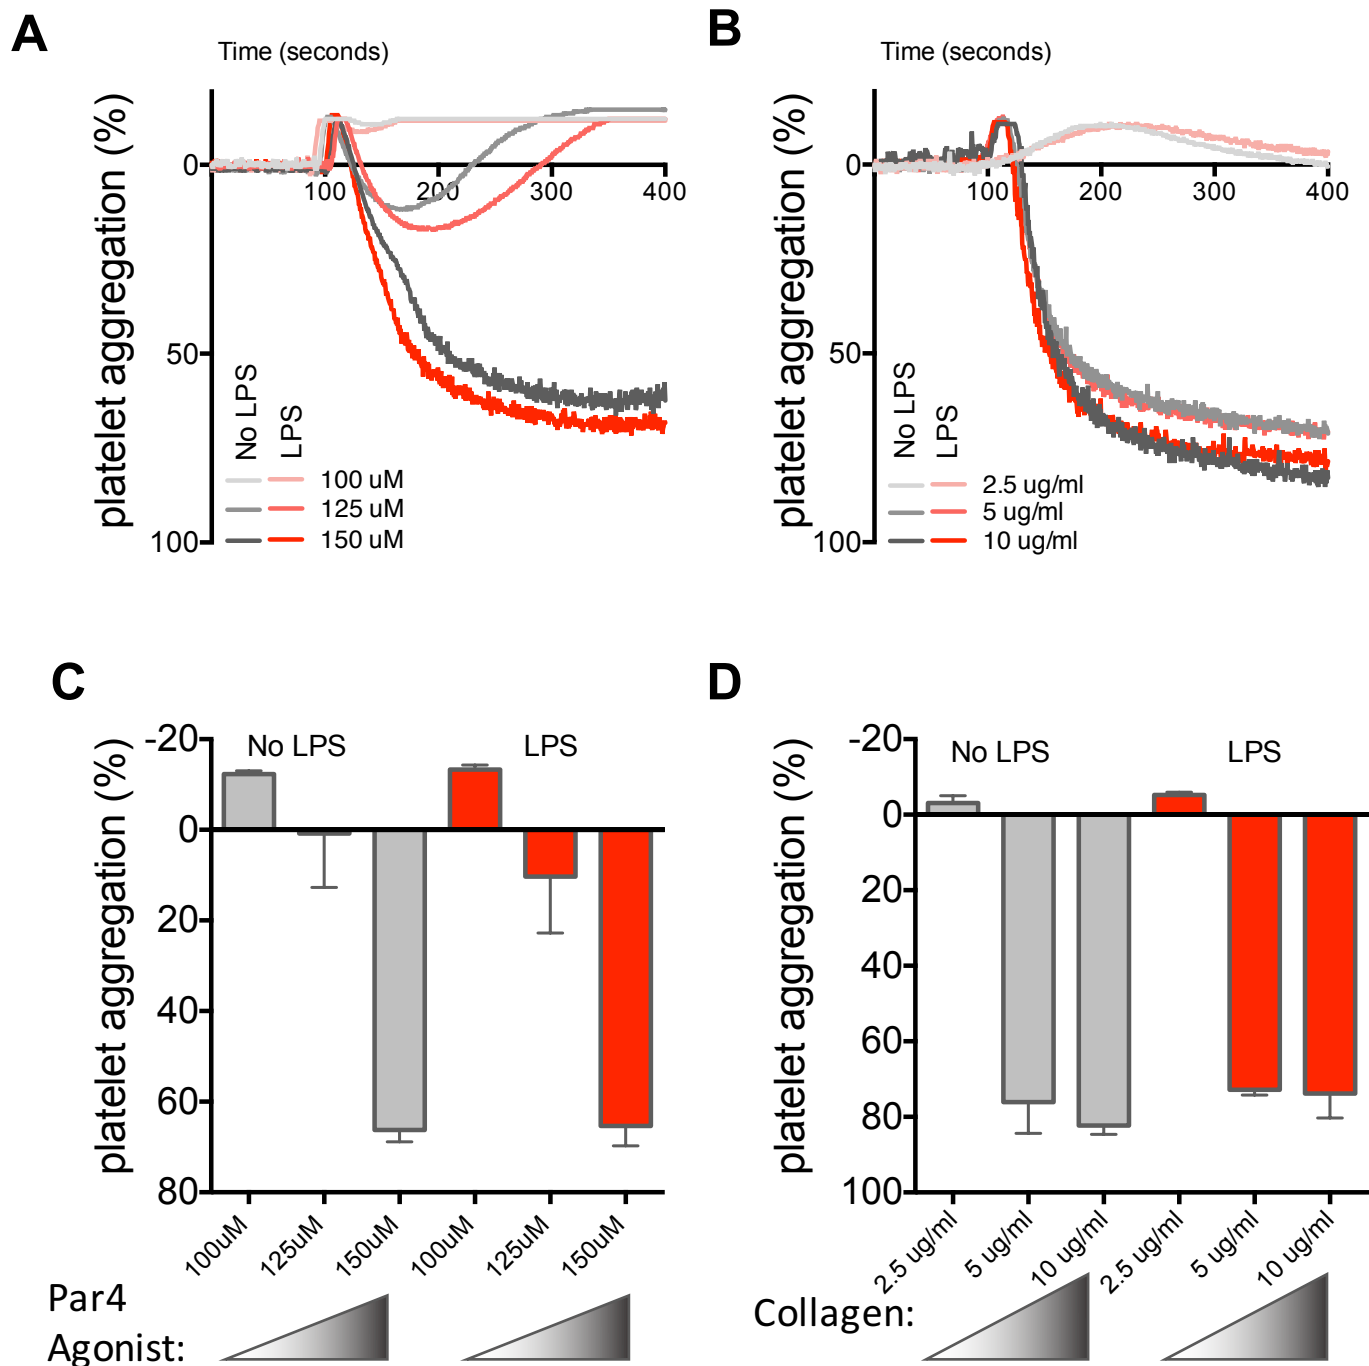

**Supplemental Figure 4. Platelet aggregation sensitivity to agonists following LPS.**

(A) PAR4- and (B) collagen induced platelet aggregation was measured in platelet rich plasma obtained from C57Bl/6J mice with no LPS or with 3 hours of LPS exposure showing representative aggregation experiment of 2 independent experiments (LPS = red tracing; No LPS = grey tracing). Quantification of PAR4- (C) and collagen (D) induced aggregation at 250 sec after sub-threshold and escalating doses of agonist, as indicated. Data represent mean  $\pm$  SEM ( $n = 3 - 7$  replicates per dose).

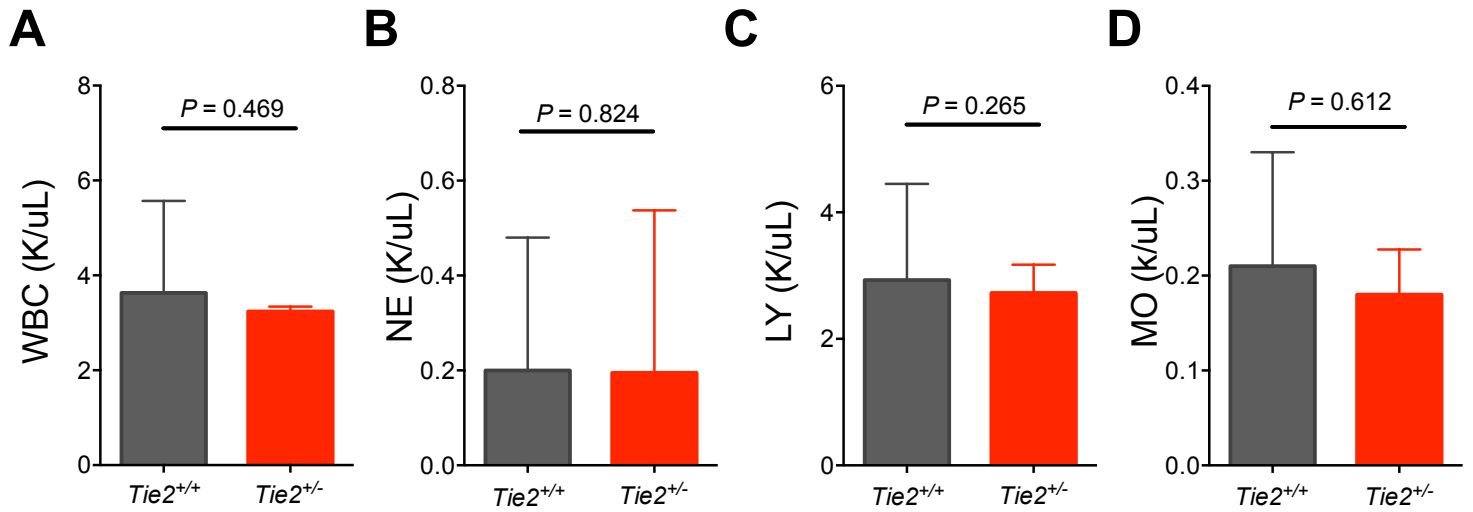

**Supplemental Figure 5. Systemic measures of blood parameters in *Tie2* heterozygous (*Tie2*<sup>+/-</sup>) and wild-type littermate controls (*Tie2*<sup>+/+</sup>).**

Complete blood count in mice with indicated genetic background. **(A)** WBC, white blood cells; **(B)** NE, neutrophils; **(C)** LY, lymphocytes; **(D)** MO, monocytes. \**P*<0.05, \*\**P*<0.01, one-way ANOVA, *n* = 7 – 10 per group.

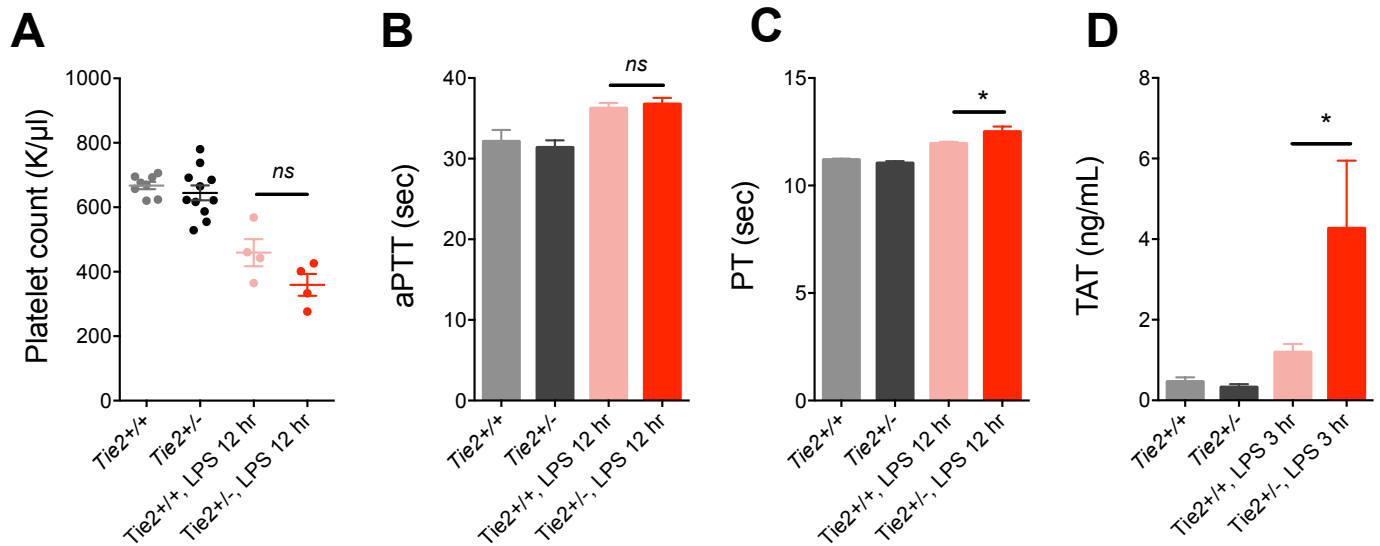

**Supplemental Figure 6. Exacerbated coagulation parameters and markers of thrombin generation in Tie2 heterozygous (*Tie2*<sup>+/-</sup>) mice with LPS.**

**(A)** Whole blood platelet count, **(B)** aPTT (activated partial thromboplastin time), **(C)** PT (pro-thrombin time) and **(D)** levels of circulating thrombin-anti-thrombin (TAT) complex measured in CD-1 Tie2 heterozygous mice (*Tie2*<sup>+/-</sup>) and wild-type littermate controls (*Tie2*<sup>+/+</sup>) mice with samples collected at baseline (no LPS) and the indicated times post challenge with LPS (12.5 mg/kg). \*P < 0.05, \*\*P < 0.01, one-way ANOVA with post test comparing differences between genotype at baseline and post LPS.

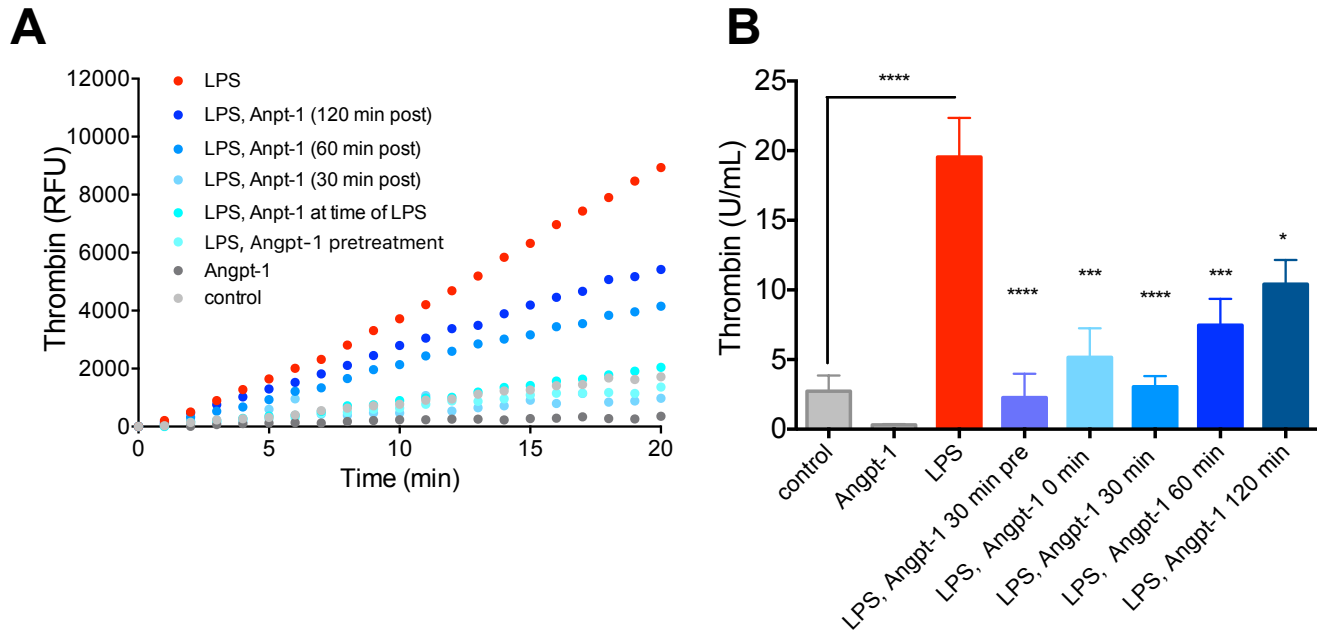

**Supplemental Figure 7. Angiopoietin-1 application post LPS stimulation suppresses prothrombotic actions on the endothelium.**

Thrombin generation was determined on human umbilical vein endothelial cells (HUVECs) incubated with Angpt-1 (200 ng/ml) at the indicated time per and post exposure of HUVECs to LPS complex. Representative experiment is depicted as **(A)** arbitrary fluorescent units (RFU) as a function of time and the **(B)** rate of the reaction for thrombin generation converted to units/ml and normalized to controls. \* $P < 0.05$ , \*\* $P < 0.01$ , \*\*\* $P < 0.001$ , one-way ANOVA with Bonferroni's post-test.

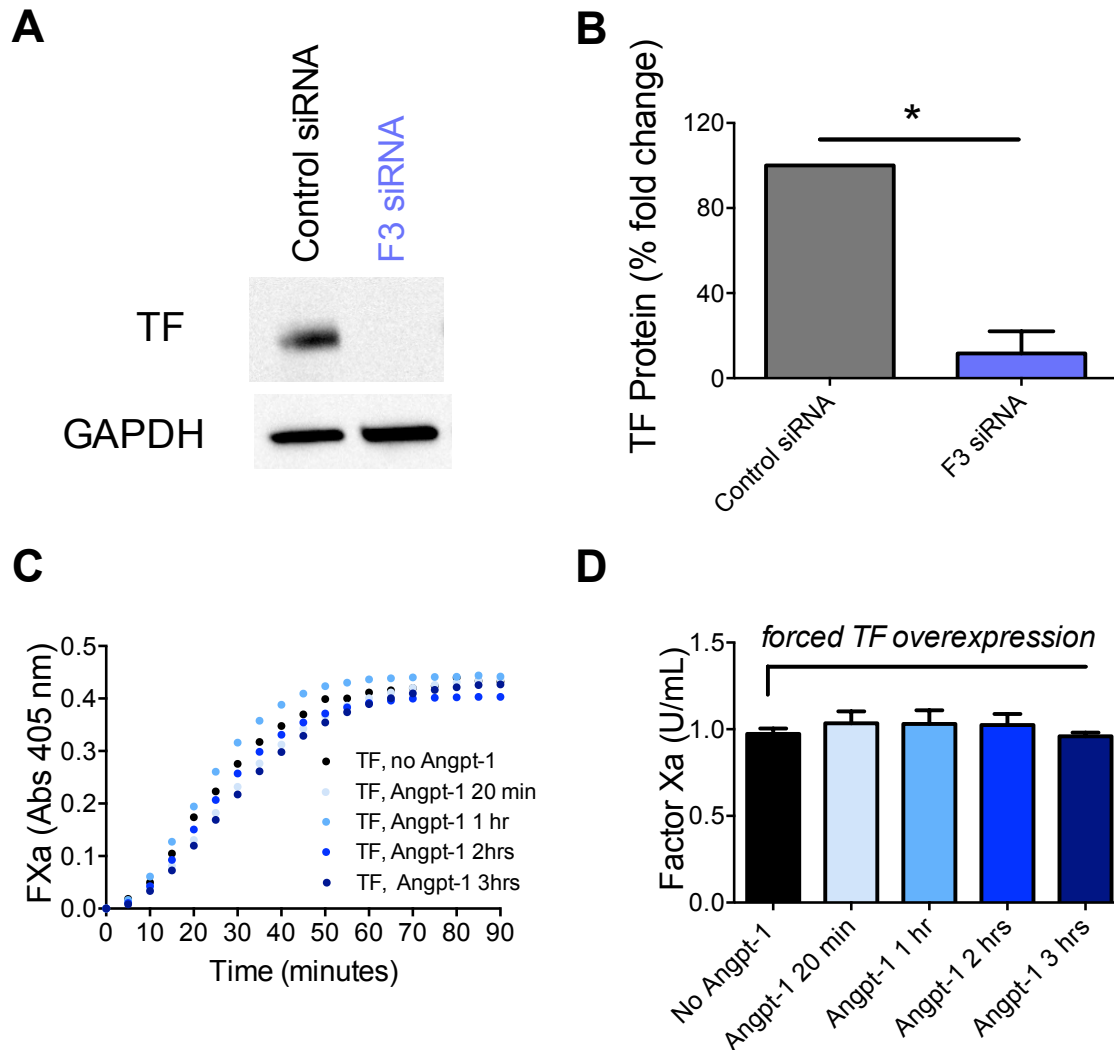

**Supplemental Figure 8. Tissue factor expression in endothelial cells.**

**(A)** To evaluate the specificity of the tissue factor antibody, HUVECs exposed to either control siRNA or siRNA directed at tissue factor. HUVECs were then stimulated with TNF- $\alpha$  (10 ng/ml; Millipore) for 3.5 hr and evaluated for tissue factor expression by Western blot analysis. A representative western blot is shown. **(B)** Quantification of tissue factor expression using densitometry ( $N = 2$  representative experiments). **(C,D)** Ea.hy926 cell line stably expressing tissue factor was incubated with control or Angpt-1 (200 ng/ml), independent of LPS, for indicated durations and FXa generation was measured using chromogenic substrate. **(C)** Absorbance at 405 nm is depicted as a function of time. **(D)** The rate of the reaction was converted to units/ml and normalized to controls. Data represent mean  $\pm$  SEM ( $n = 3$ ) from a representative experiment.

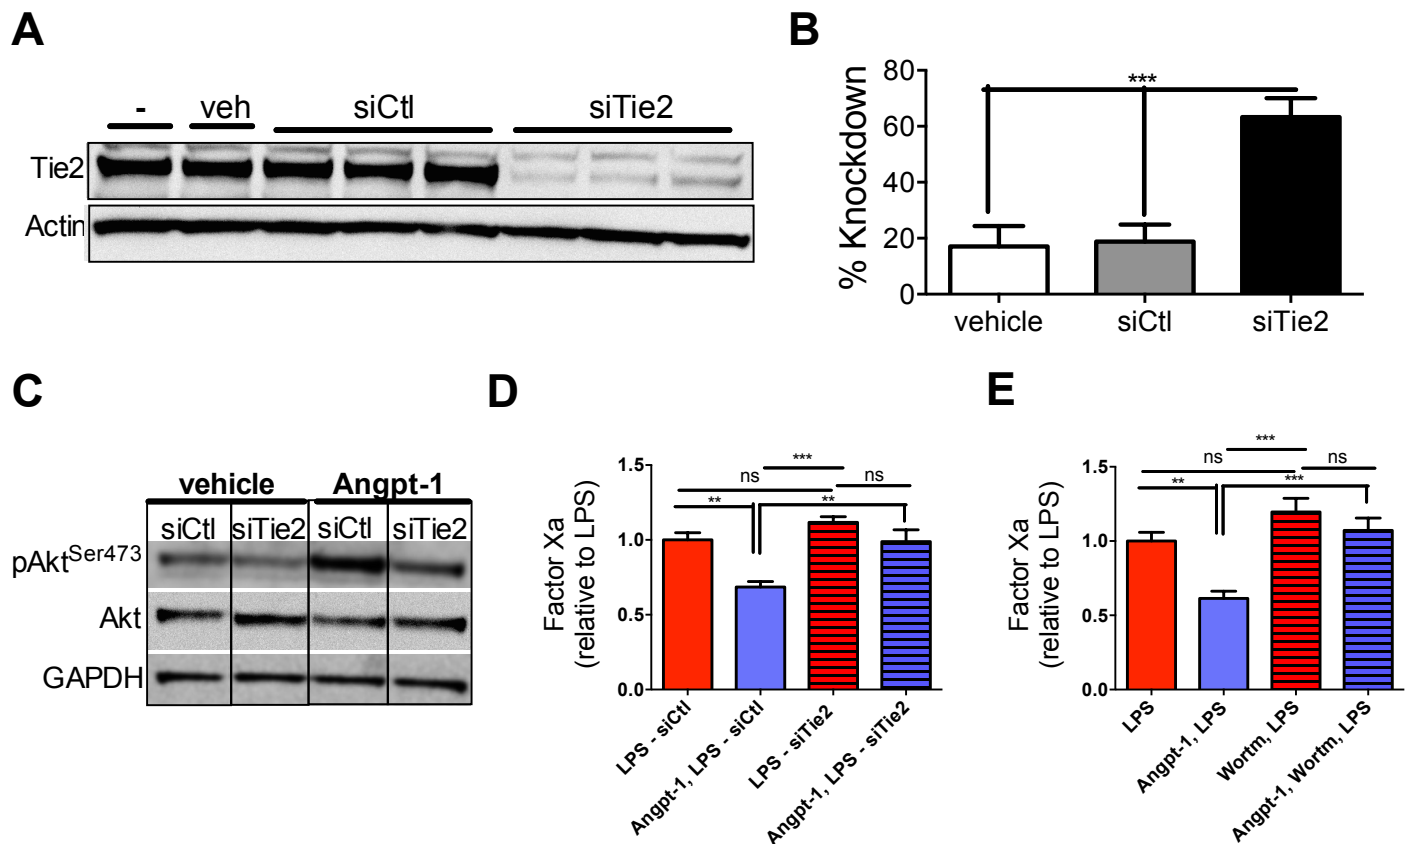

**Supplemental Figure 9. Angiopoietin-1 blunts LPS-induced Factor Xa generation on endothelial cells in a Tie2-PI3K dependent fashion.**

(A-D) HUVECs were transfected with control siRNA (siCtl) or Tie2 siRNA (siTie2) for 48 hours. (A) Immunoblot of Tie2 knockdown. (B) qRT-PCR data of 3 independent experiments, \*\*\* $P < 0.001$ , one-way ANOVA with Bonferroni's post-test. (C) siRNA-treated HUVECs were incubated with vehicle or Angpt-1 (200 ng/ml) for 30 min. Immunoblot analysis of HUVEC lysates for pAkt<sup>Ser473</sup>, total Akt and GAPDH. (D) siRNA-treated HUVECs were pre-incubated with vehicle or Angpt-1 (200 ng/ml) for 30 min prior to addition of LPS complex. FXa generation was measured using a chromogenic substrate (Abs 405 nm). The rate of the reaction was converted to units/ml and normalized to LPS. Data represent mean  $\pm$  SEM,  $n = 6$  from two independent experiments. \*\* $P < 0.01$ , \*\*\* $P < 0.001$ , one-way ANOVA with Bonferroni's post-test. (E) HUVECs were pre-incubated with vehicle, Angpt-1 (200 ng/ml) and/or PI3K inhibitor wortmannin (100 nM) for 30 min prior to addition of LPS complex. FXa generation was measured using a chromogenic substrate (Abs 405 nm). The rate of the reaction was converted to units/ml and normalized to LPS. Data represent mean  $\pm$  SEM ( $n = 3$ ). \* $P < 0.05$ , \*\* $P < 0.01$ , one-way ANOVA with Bonferroni's post-test.

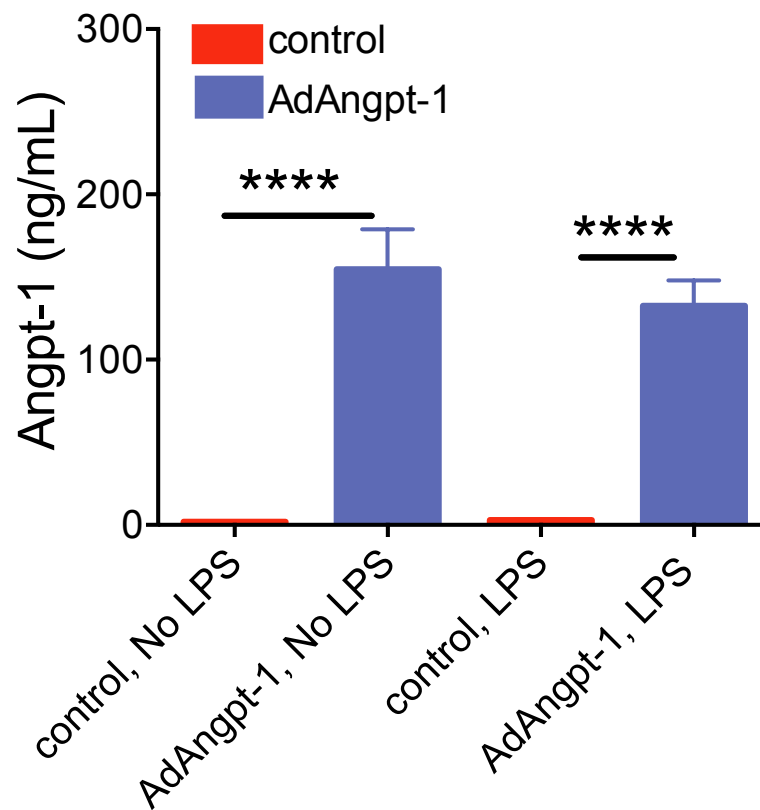

**Supplemental Figure 10. Angiopoietin-1 levels in experimental adenoviral mice.**

Angpt-1 levels in plasma of C57Bl/6J mice injected adenovirus expressing Angpt-1 (AdAngpt-1) or a control adenovirus (control) with and without LPS (10 mg/kg).

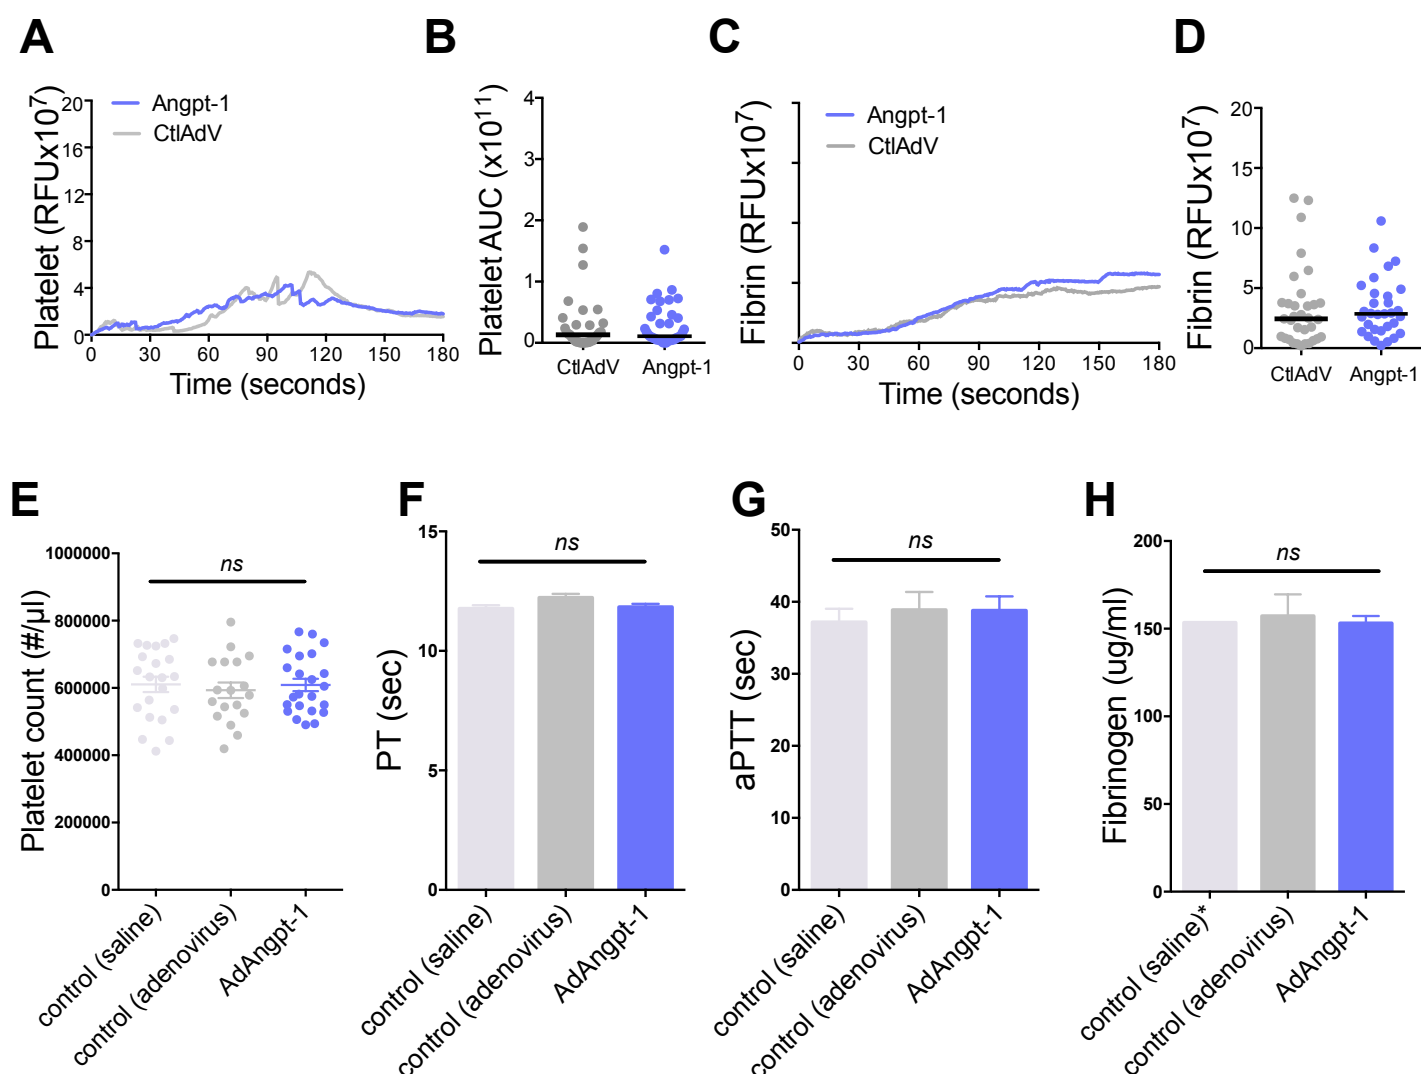

**Supplemental Figure 11. Baseline thrombus formation and coagulation parameters in experimental mice. (A-D)** Representative binarized images of thrombus formation following laser injury in mice injected with control adenovirus (CtlAdv) (top) or an adenovirus expressing Angpt-1 (AdAngpt-1). Median integrated platelet (**A,B**) and fibrin (**C,D**) fluorescent intensities (**A,C**) and AUC (**B,D**) were calculated for individual thrombi from representative binarized images of thrombus formation following laser injury in mice injected with control adenovirus (CtlAdv; grey) or an adenovirus expressing Angpt-1 (AdAngpt-1; blue). CtlAdv (n = 2; 33 thrombi), AdAngpt-1 (n = 3; 38 thrombi). (**E**) Whole blood platelet count, (**F**) PT (pro-thrombin time), (**G**) aPTT (activated partial thromboplastin time), and (**H**) plasma fibrinogen levels were measured in C57Bl/6J mice treated with CtlAdv, AdAngpt-1 or vehicle saline.

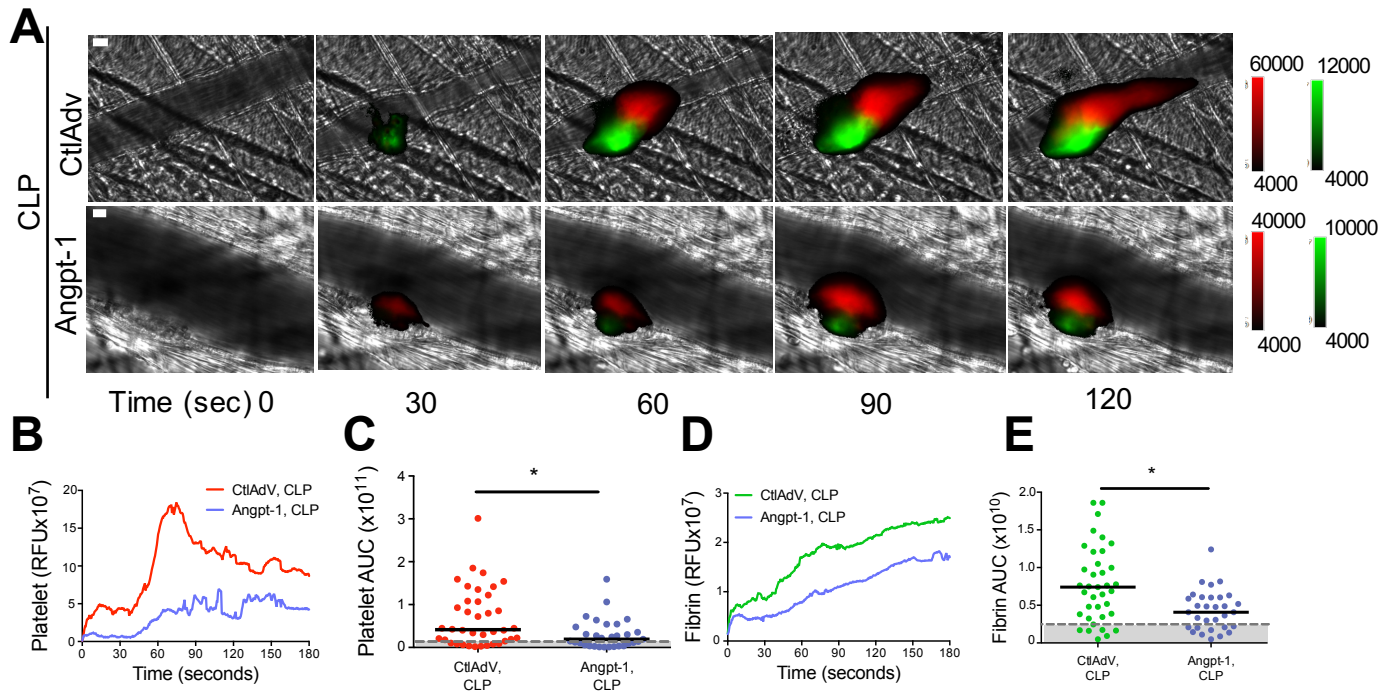

**Supplemental Figure 12. Tie2 activation normalizes the injury-induced thrombotic response in a cecal ligation and puncture (CLP) polymicrobial sepsis model.**

Representative binarized images of thrombus formation (**A**) following laser injury in mice injected with control adenovirus (CtlAdv) (top) or an adenovirus expressing Angpt-1 (AdAngpt-1) post cecal ligation and puncture (1-3 hrs) (*platelets = red; fibrin = green*). Median integrated platelet (**B**) and fibrin (**D**) fluorescent intensities and AUC (**C**, **E**) were calculated for individual thrombi, CtlAdv plus CLP ( $n = 3$ ; 38 thrombi), Angpt-1 plus CLP ( $n = 3$ ; 31 thrombi).

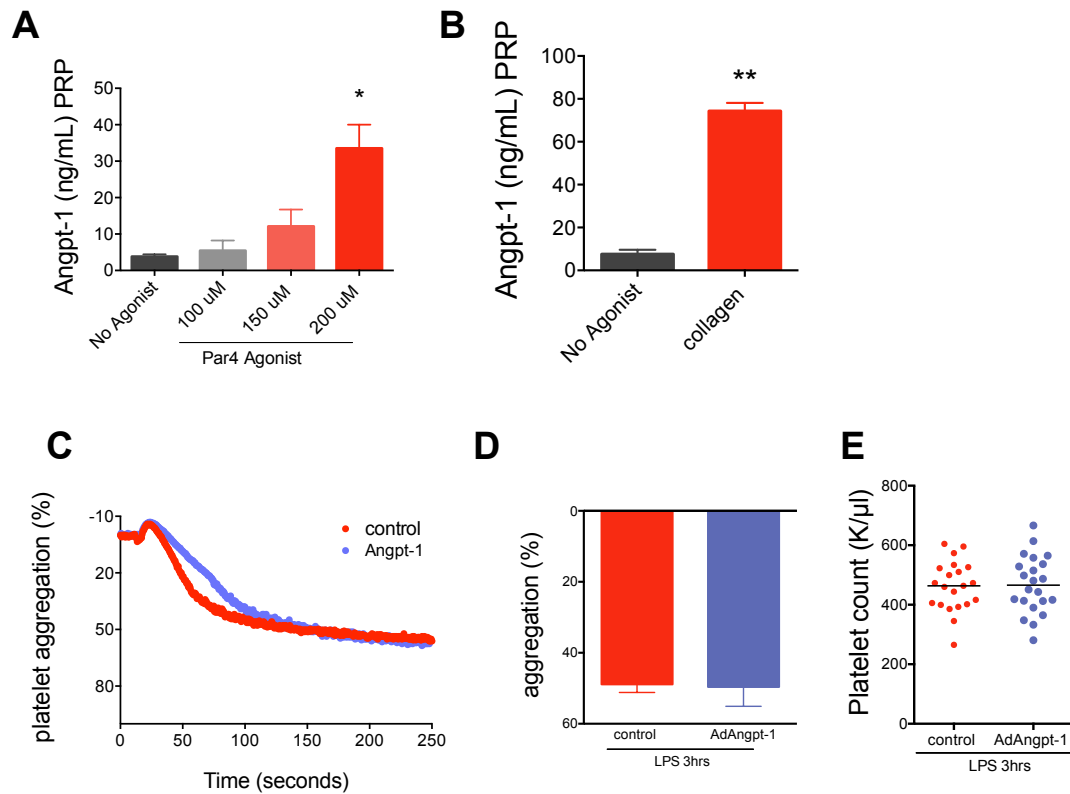

**Supplemental Figure 13. Angiopoietin-1 release and *ex vivo* platelet aggregation.**

Angpt-1 levels in platelet rich plasma (PRP) following incubation with PAR-4 agonist (**A**) or collagen (**B**). Data represents mean  $\pm$  SEM ( $n = 5$  for Par4 agonist experiment;  $n = 4$  for collagen experiment). \*:  $P < 0.05$ , one-way ANOVA; \*\*:  $P = 0.02$ , Mann Whitney U. (**C**) Representative platelet aggregation measured in PRP of mice injected with control adenovirus or AdAngpt-1 (control: red tracing; Angpt-1=blue tracing). (**D**) Quantification of PAR-4-mediated aggregation at 250 sec. (**E**) Platelet counts collected 3 hrs post LPS. Data represent mean  $\pm$  SEM ( $n = 4 - 6$ ). \* $P < 0.05$ , \*\* $P < 0.01$ , one-way ANOVA,  $n = 5$  from one representative experiment.

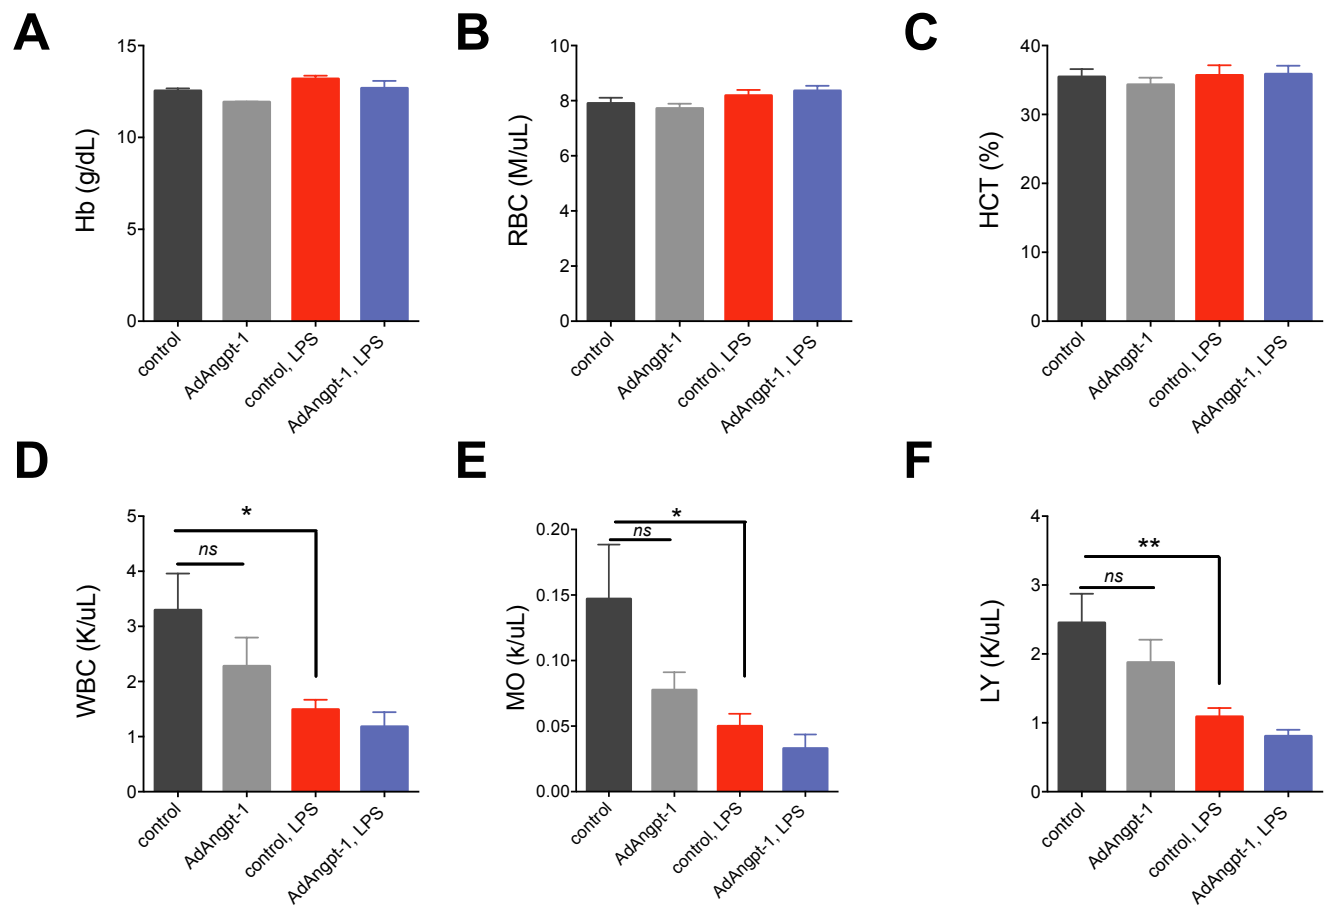

**Supplemental Figure 14. Systemic measures of blood parameters in mice with adenoviral intervention.**

Complete blood count at 3 hours post LPS or saline in mice treated with AdAngpt-1 or a control adenovirus. **(A)** RBC, red blood cells; **(B)** Hb, hemoglobin; **(C)** HCT, hematocrit; **(D)** WBC, white blood cells; **(E)** MO, monocytes; **(F)** LY, lymphocytes. \* $P < 0.05$ , \*\* $P < 0.01$ , one-way ANOVA,  $n = 5$  from one representative experiment.
